# Supplementary material for: Western corn rootworm abundance, injury to corn, and resistance to Cry3Bb1 in the local landscape of previous problem fields
Source: PubMed Central journal article supplement (PMC7394452; doi:10.1371/journal.pone.0237094), 2020-07-31
Supplement: pone.0237094.s001.pdf [file pone.0237094.s001.pdf]

## Supplemental Material

**Supplemental Table S1.** Field cropping history for fields sampled in 2015.

| <b>Year</b> | <b>Field<sup>1</sup></b>    | <b>1</b> | <b>1a</b> | <b>1b</b> | <b>1c</b> | <b>1d</b> | <b>2<sup>4</sup></b> | <b>3</b> | <b>4</b> | <b>4a</b> | <b>4b</b> | <b>4c</b> |
|-------------|-----------------------------|----------|-----------|-----------|-----------|-----------|----------------------|----------|----------|-----------|-----------|-----------|
| <b>2015</b> | <b>Crop<sup>2</sup></b>     | Corn     | Corn      | Corn      | Corn      | Corn      | Corn                 | Corn     | Corn     | Corn      | Corn      | Corn      |
|             | <b>Bt toxin<sup>3</sup></b> | 5        | 4         | 4         | 4         | 4         | 0                    | 4        | 1        | 0         | 5         | 4         |
|             | <b>Soil</b>                 | None     | None      | None      | None      | None      | None                 | None     | Yes      | Yes       | Yes       | Yes       |
| <b>2014</b> | <b>Crop</b>                 | Corn     | Corn      | Corn      | Corn      | Corn      | Soy                  | Corn     | Soy      | Soy       | Corn      | Corn      |
|             | <b>Bt toxin</b>             | 5        | 4         | 4         | 4         | 4         | .                    | 4        | .        | .         | 4         | 3         |
|             | <b>Soil</b>                 | None     | None      | None      | None      | None      | .                    | None     | .        | .         | Yes       | Yes       |
| <b>2013</b> | <b>Crop</b>                 | Corn     | Corn      | Corn      | Corn      | Corn      | Corn                 | Corn     | Corn     | Corn      | Corn      | Corn      |
|             | <b>Bt toxin</b>             | 5        | 0         | 0         | 4         | 4         | Uk                   | 4        | 5        | 5         | 0         | 5         |
|             | <b>Soil</b>                 | None     | None      | None      | None      | None      | Uk                   | None     | Yes      | Yes       | None      | Yes       |
| <b>2012</b> | <b>Crop</b>                 | Corn     | Soy       | Soy       | Corn      | Corn      | Corn                 | Corn     | Corn     | Corn      | Soy       | Corn      |
|             | <b>Bt toxin</b>             | 5        | .         | .         | 4         | 4         | Uk                   | 1        | 3        | 3         | .         | 4         |
|             | <b>Soil</b>                 | None     | .         | .         | None      | None      | Uk                   | None     | Yes      | Yes       | .         | Yes       |
| <b>2011</b> | <b>Crop</b>                 | Corn     | Corn      | Corn      | Corn      | Corn      | Soy                  | Corn     | Corn     | Corn      | Corn      | Corn      |
|             | <b>Bt toxin</b>             | 0        | 4         | 4         | 4         | 4         | .                    | Uk       | Uk       | Uk        | 4         | 4         |
|             | <b>Soil</b>                 | None     | None      | None      | None      | None      | .                    | None     | Yes      | Yes       | None      | Yes       |
| <b>2010</b> | <b>Crop</b>                 | Soy      | Corn      | Corn      | Corn      | Corn      | Corn                 | Corn     | Corn     | Corn      | Corn      | Corn      |
|             | <b>Bt toxin</b>             | .        | 4         | 4         | 4         | 4         | Uk                   | Uk       | Uk       | Uk        | Uk        | 4         |
|             | <b>Soil</b>                 | .        | None      | None      | None      | None      | Uk                   | None     | Yes      | Yes       | None      | Yes       |

<sup>1</sup>Fields with numbers only are focal fields, and fields with a number and a letter are surrounding fields associated with the focal field number (e.g., Field 1 is a focal field, and Fields 1a, 1b, 1c, and 1d are its associated surrounding fields).

<sup>2</sup>Corn = Corn; Soy = Soybean; Alfa = Alfalfa; Uk = Unknown.

<sup>3</sup>Key for Bt toxins: 0 = no Bt targeting rootworm present; 1 = Cry3Bb1; 2 = Cry34/35Ab1; 3 = mCry3A; 4 = Cry3Bb1+Cry34/35Ab1; 5 = mCry3A+Cry34/35Ab1; Uk = Unknown.

<sup>4</sup>Excluded from multiple regression analysis.

**Supplemental Table S1. (Continued)** Field cropping history for fields sampled in 2015.

| <b>Year</b> | <b>Field<sup>1</sup></b>    | <b>4d<sup>4</sup></b> | <b>5<sup>4</sup></b> | <b>5a<sup>4</sup></b> | <b>5b</b> | <b>5c<sup>4</sup></b> | <b>5d</b> |
|-------------|-----------------------------|-----------------------|----------------------|-----------------------|-----------|-----------------------|-----------|
| <b>2015</b> | <b>Crop<sup>2</sup></b>     | Corn                  | Corn                 | Corn                  | Corn      | Corn                  | Corn      |
|             | <b>Bt toxin<sup>3</sup></b> | 4                     | 0                    | 0                     | 4         | 4                     | 4         |
|             | <b>Soil</b>                 | Yes                   | Yes                  | Yes                   | Yes       | None                  | Yes       |
| <b>2014</b> | <b>Crop</b>                 | Corn                  | Corn                 | Corn                  | Corn      | Corn                  | Corn      |
|             | <b>Bt toxin</b>             | Uk                    | Uk                   | Uk                    | 4         | Uk                    | 4         |
|             | <b>Soil</b>                 | Uk                    | Uk                   | Uk                    | Yes       | None                  | Yes       |
| <b>2013</b> | <b>Crop</b>                 | Corn                  | Corn                 | Corn                  | Corn      | Corn                  | Corn      |
|             | <b>Bt toxin</b>             | Uk                    | Uk                   | Uk                    | 4         | Uk                    | 4         |
|             | <b>Soil</b>                 | Uk                    | Uk                   | Uk                    | Yes       | None                  | Yes       |
| <b>2012</b> | <b>Crop</b>                 | Corn                  | Corn                 | Corn                  | Corn      | Corn                  | Corn      |
|             | <b>Bt toxin</b>             | Uk                    | Uk                   | Uk                    | 4         | Uk                    | 4         |
|             | <b>Soil</b>                 | Uk                    | Uk                   | Uk                    | None      | None                  | None      |
| <b>2011</b> | <b>Crop</b>                 | Corn                  | Corn                 | Corn                  | Corn      | Corn                  | Corn      |
|             | <b>Bt toxin</b>             | Uk                    | Uk                   | Uk                    | 4         | Uk                    | 4         |
|             | <b>Soil</b>                 | Uk                    | Uk                   | Uk                    | None      | None                  | None      |
| <b>2010</b> | <b>Crop</b>                 | Corn                  | Soy                  | Corn                  | Corn      | Corn                  | Corn      |
|             | <b>Bt toxin</b>             | Uk                    | .                    | Uk                    | 4         | Uk                    | 4         |
|             | <b>Soil</b>                 | Uk                    | .                    | Uk                    | None      | None                  | None      |

<sup>1</sup>Fields with numbers only are focal fields, and fields with a number and a letter are surrounding fields associated with the focal field number (e.g., Field 1 is a focal field, and Fields 1a, 1b, 1c, and 1d are its associated surrounding fields).

<sup>2</sup>Corn = Corn; Soy = Soybean; Alfa = Alfalfa; Uk = Unknown.

<sup>3</sup>Key for Bt toxins: 0 = no Bt targeting rootworm present; 1 = Cry3Bb1; 2 = Cry34/35Ab1; 3 = mCry3A; 4 = Cry3Bb1+Cry34/35Ab1; 5 = mCry3A+Cry34/35Ab1; Uk = Unknown.

<sup>4</sup>Excluded from multiple regression analysis.

**Supplemental Table S2.** Field cropping history for fields sampled in 2016.

| <b>Year</b> | <b>Field<sup>1</sup></b>    | <b>6</b> | <b>6a<sup>4</sup></b> | <b>6b</b> | <b>6c</b> | <b>7</b> | <b>7a</b> | <b>7b</b> | <b>7c</b> | <b>8<sup>4</sup></b> | <b>8a<sup>4</sup></b> | <b>9</b> |
|-------------|-----------------------------|----------|-----------------------|-----------|-----------|----------|-----------|-----------|-----------|----------------------|-----------------------|----------|
| <b>2016</b> | <b>Crop<sup>2</sup></b>     | Corn     | Corn                  | Corn      | Corn      | Corn     | Corn      | Corn      | Corn      | Corn                 | Corn                  | Corn     |
|             | <b>Bt toxin<sup>3</sup></b> | 4        | 2                     | 4         | 5         | 4        | 2         | 0         | 5         | 1                    | 3                     | 1        |
|             | <b>Soil</b>                 | None     | None                  | Yes       | None      | Yes      | Yes       | Yes       | None      | None                 | None                  | None     |
| <b>2015</b> | <b>Crop</b>                 | Corn     | Corn                  | Corn      | Corn      | Corn     | Corn      | Corn      | Corn      | Corn                 | Corn                  | Corn     |
|             | <b>Bt toxin</b>             | 4        | Uk                    | 4         | 2         | 4        | 4         | 4         | 5         | Bt-Uk                | Bt-Uk                 | 0        |
|             | <b>Soil</b>                 | None     | None                  | Yes       | None      | Yes      | Yes       | Yes       | None      | None                 | None                  | None     |
| <b>2014</b> | <b>Crop</b>                 | Corn     | Alfa                  | Corn      | Corn      | Corn     | Corn      | Corn      | Soy       | Corn                 | Corn                  | Corn     |
|             | <b>Bt toxin</b>             | 3        | .                     | 0         | 4         | 4        | 4         | 4         | .         | 0                    | 0                     | 1        |
|             | <b>Soil</b>                 | None     | .                     | None      | None      | Yes      | Yes       | Yes       | .         | None                 | None                  | None     |
| <b>2013</b> | <b>Crop</b>                 | Corn     | Alfa                  | Alfa      | Corn      | Soy      | Corn      | Corn      | Corn      | Soy                  | Soy                   | Corn     |
|             | <b>Bt toxin</b>             | Uk       | .                     | .         | 0         | .        | 4         | 4         | 5         | .                    | .                     | 4        |
|             | <b>Soil</b>                 | None     | .                     | .         | None      | .        | Yes       | Yes       | None      | .                    | .                     | Yes      |
| <b>2012</b> | <b>Crop</b>                 | Corn     | Alfa                  | Alfa      | Corn      | Corn     | Corn      | Corn      | Corn      | Corn                 | Corn                  | Corn     |
|             | <b>Bt toxin</b>             | Uk       | .                     | .         | 4         | 1        | 1         | 1         | 5         | Bt-Uk                | Bt-Uk                 | 1        |
|             | <b>Soil</b>                 | None     | .                     | .         | None      | None     | None      | None      | None      | None                 | None                  | None     |
| <b>2011</b> | <b>Crop</b>                 | Corn     | Alfa                  | Alfa      | Corn      | Corn     | Soy       | Soy       | Corn      | Corn                 | Corn                  | Corn     |
|             | <b>Bt toxin</b>             | Uk       | .                     | .         | 0         | Uk       | .         | .         | 5         | Bt-Uk                | Bt-Uk                 | 1        |
|             | <b>Soil</b>                 | Yes      | .                     | .         | None      | None     | .         | .         | None      | None                 | None                  | None     |

<sup>1</sup>Fields with numbers only are focal fields, and fields with a number and a letter are surrounding fields associated with the focal field number (e.g., Field 1 is a focal field, and Fields 1a, 1b, 1c, and 1d are its associated surrounding fields).

<sup>2</sup>Corn = Corn; Soy = Soybean; Alfa = Alfalfa; Uk = Unknown.

<sup>3</sup>Key for Bt toxins: 0 = no Bt targeting rootworm present; 1 = Cry3Bb1; 2 = Cry34/35Ab1; 3 = mCry3A; 4 = Cry3Bb1+Cry34/35Ab1; 5 = mCry3A+Cry34/35Ab1; Uk = Unknown.

<sup>4</sup>Excluded from multiple regression analysis.

**Supplemental Table S2. (Continued)** Field cropping history for fields sampled in 2016.

| <b>Year</b> | <b>Field<sup>1</sup></b>    | <b>9a</b> | <b>9b</b> | <b>9c</b> | <b>10</b> | <b>10a</b> | <b>11</b> | <b>11a</b> | <b>11b<sup>4</sup></b> | <b>11c<sup>4</sup></b> | <b>11d<sup>4</sup></b> |
|-------------|-----------------------------|-----------|-----------|-----------|-----------|------------|-----------|------------|------------------------|------------------------|------------------------|
| <b>2016</b> | <b>Crop<sup>2</sup></b>     | Corn      | Corn      | Corn      | Corn      | Corn       | Corn      | Corn       | Corn                   | Corn                   | Corn                   |
|             | <b>Bt toxin<sup>3</sup></b> | 0         | 3         | 4         | 1         | 4          | 4         | 4          | 1                      | 4                      | 4                      |
|             | <b>Soil</b>                 | None      | Yes       | None      | None      | None       | None      | None       | None                   | None                   | None                   |
| <b>2015</b> | <b>Crop</b>                 | Soy       | Corn      | Corn      | Corn      | Soy        | Corn      | Corn       | Soy                    | Corn                   | Soy                    |
|             | <b>Bt toxin</b>             | .         | 3         | 4         | 4         | .          | 4         | 4          | .                      | Uk                     | .                      |
|             | <b>Soil</b>                 | .         | Yes       | None      | Yes       | .          | None      | None       | .                      | Uk                     | .                      |
| <b>2014</b> | <b>Crop</b>                 | Corn      | Corn      | Soy       | Corn      | Corn       | Corn      | Corn       | Corn                   | Corn                   | Corn                   |
|             | <b>Bt toxin</b>             | 3         | 3         | .         | 4         | 4          | 4         | 4          | Uk                     | Uk                     | Uk                     |
|             | <b>Soil</b>                 | None      | None      | .         | None      | None       | None      | None       | Uk                     | Uk                     | Uk                     |
| <b>2013</b> | <b>Crop</b>                 | Soy       | Corn      | Corn      | Corn      | Corn       | Corn      | Corn       | Corn                   | Corn                   | Corn                   |
|             | <b>Bt toxin</b>             | .         | 3         | Uk        | 4         | 4          | 4         | Uk         | Uk                     | Uk                     | Uk                     |
|             | <b>Soil</b>                 | .         | None      | Uk        | None      | None       | None      | None       | Uk                     | Uk                     | Uk                     |
| <b>2012</b> | <b>Crop</b>                 | Corn      | Corn      | Soy       | Corn      | Corn       | Corn      | Corn       | Soy                    | Corn                   | Corn                   |
|             | <b>Bt toxin</b>             | 3         | 3         | .         | 4         | 4          | 4         | Uk         | .                      | Uk                     | Uk                     |
|             | <b>Soil</b>                 | None      | None      | .         | None      | None       | None      | None       | .                      | Uk                     | Uk                     |
| <b>2011</b> | <b>Crop</b>                 | Soy       | Soy       | Corn      | Corn      | Soy        | Corn      | Corn       | Corn                   | Corn                   | Soy                    |
|             | <b>Bt toxin</b>             | .         | .         | Uk        | 1         | .          | 4         | Uk         | Uk                     | Uk                     | .                      |
|             | <b>Soil</b>                 | .         | .         | Uk        | None      | .          | None      | None       | Uk                     | Uk                     | .                      |

<sup>1</sup>Fields with numbers only are focal fields, and fields with a number and a letter are surrounding fields associated with the focal field number (e.g., Field 1 is a focal field, and Fields 1a, 1b, 1c, and 1d are its associated surrounding fields).

<sup>2</sup>Corn = Corn; Soy = Soybean; Alfa = Alfalfa; Uk = Unknown.

<sup>3</sup>Key for Bt toxins: 0 = no Bt targeting rootworm present; 1 = Cry3Bb1; 2 = Cry34/35Ab1; 3 = mCry3A; 4 = Cry3Bb1+Cry34/35Ab1; 5 = mCry3A+Cry34/35Ab1; Uk = Unknown.

<sup>4</sup>Excluded from multiple regression analysis.

**Supplemental Table S3.** Field cropping history for fields sampled in 2017.

| <b>Year</b> | <b>Field<sup>1</sup></b>    | <b>12</b> | <b>12a</b> | <b>12b</b> | <b>13</b> | <b>13a<sup>4</sup></b> | <b>13b</b> | <b>13c</b> | <b>14<sup>4</sup></b> | <b>14a<sup>4</sup></b> | <b>14b</b> | <b>14c</b> |
|-------------|-----------------------------|-----------|------------|------------|-----------|------------------------|------------|------------|-----------------------|------------------------|------------|------------|
| <b>2017</b> | <b>Crop<sup>2</sup></b>     | Corn      | Corn       | Corn       | Corn      | Corn                   | Corn       | Corn       | Corn                  | Corn                   | Corn       | Corn       |
|             | <b>Bt toxin<sup>3</sup></b> | 4         | 0          | 0          | 5         | 0                      | 0          | 4          | 1                     | 1                      | 0          | 4          |
|             | <b>Soil</b>                 | Yes       | None       | Yes        | Yes       | None                   | None       | None       | None                  | None                   | None       | None       |
| <b>2016</b> | <b>Crop</b>                 | Corn      | Soy        | Soy        | Corn      | Soy                    | Soy        | Corn       | Soy                   | Soy                    | Soy        | Corn       |
|             | <b>Bt toxin</b>             | 0         | .          | .          | 3         | .                      | .          | 0          | .                     | .                      | .          | 4          |
|             | <b>Soil</b>                 | Yes       | .          | .          | Yes       | .                      | .          | None       | .                     | .                      | .          | None       |
| <b>2015</b> | <b>Crop</b>                 | Soy       | Corn       | Corn       | Corn      | Corn                   | Corn       | Soy        | Corn                  | Corn                   | Corn       | Corn       |
|             | <b>Bt toxin</b>             | .         | 0          | 0          | 3         | 3                      | 4          | .          | Uk                    | Uk                     | 0          | 4          |
|             | <b>Soil</b>                 | .         | None       | Yes        | Yes       | Uk                     | None       | .          | None                  | None                   | None       | None       |
| <b>2014</b> | <b>Crop</b>                 | Corn      | Soy        | Corn       | Corn      | Soy                    | Corn       | Corn       | Soy                   | Soy                    | Soy        | Corn       |
|             | <b>Bt toxin</b>             | 4         | .          | 0          | 3         | .                      | 0          | 4          | .                     | .                      | .          | 4          |
|             | <b>Soil</b>                 | None      | .          | Yes        | Yes       | .                      | None       | None       | .                     | .                      | .          | None       |
| <b>2013</b> | <b>Crop</b>                 | Corn      | Corn       | Soy        | Corn      | Corn                   | Soy        | Corn       | Corn                  | Corn                   | Corn       | Soy        |
|             | <b>Bt toxin</b>             | 1         | 0          | .          | 3         | Uk                     | .          | 0          | Uk                    | Uk                     | Uk         | .          |
|             | <b>Soil</b>                 | None      | None       | .          | Yes       | Uk                     | .          | None       | None                  | None                   | None       | .          |
| <b>2012</b> | <b>Crop</b>                 | Corn      | Soy        | Corn       | Corn      | Soy                    | Corn       | Soy        | Soy                   | Soy                    | Corn       | Corn       |
|             | <b>Bt toxin</b>             | 1         | .          | 0          | 0         | .                      | 4          | .          | .                     | .                      | Uk         | 4          |
|             | <b>Soil</b>                 | None      | .          | None       | None      | .                      | None       | .          | .                     | .                      | None       | None       |

<sup>1</sup>Fields with numbers only are focal fields, and fields with a number and a letter are surrounding fields associated with the focal field number (e.g., Field 1 is a focal field, and Fields 1a, 1b, 1c, and 1d are its associated surrounding fields).

<sup>2</sup>Corn = Corn; Soy = Soybean; Alfa = Alfalfa; Uk = Unknown.

<sup>3</sup>Key for Bt toxins: 0 = no Bt targeting rootworm present; 1 = Cry3Bb1; 2 = Cry34/35Ab1; 3 = mCry3A; 4 = Cry3Bb1+Cry34/35Ab1; 5 = mCry3A+Cry34/35Ab1; Uk = Unknown.

<sup>4</sup>Excluded from multiple regression analysis.

**Supplemental Table S3. (Continued)** Field cropping history for fields sampled in 2017.

| <b>Year</b> | <b>Field<sup>1</sup></b>    | <b>15</b> | <b>15a</b> | <b>15b</b> | <b>15c</b> | <b>16</b> | <b>16a</b> | <b>17</b> | <b>17a</b> | <b>18<sup>4</sup></b> | <b>18a<sup>4</sup></b> | <b>18b<sup>4</sup></b> |
|-------------|-----------------------------|-----------|------------|------------|------------|-----------|------------|-----------|------------|-----------------------|------------------------|------------------------|
| <b>2017</b> | <b>Crop<sup>2</sup></b>     | Corn      | Corn       | Corn       | Corn       | Corn      | Corn       | Corn      | Corn       | Corn                  | Corn                   | Corn                   |
|             | <b>Bt toxin<sup>3</sup></b> | 4         | 4          | 4          | 4          | 4         | 4          | 4         | 4          | 4                     | 5                      | 2                      |
|             | <b>Soil</b>                 | None      | None       | None       | Yes        | None      | None       | None      | None       | None                  | None                   | None                   |
| <b>2016</b> | <b>Crop</b>                 | Corn      | Corn       | Soy        | Corn       | Corn      | Corn       | Corn      | Corn       | Corn                  | Corn                   | Corn                   |
|             | <b>Bt toxin</b>             | 4         | 0          | .          | 4          | 4         | 0          | 4         | 4          | Uk                    | Uk                     | Uk                     |
|             | <b>Soil</b>                 | None      | None       | .          | Yes        | Yes       | None       | None      | None       | None                  | Uk                     | Uk                     |
| <b>2015</b> | <b>Crop</b>                 | Soy       | Soy        | Corn       | Corn       | Corn      | Soy        | Corn      | Corn       | Corn                  | Corn                   | Soy                    |
|             | <b>Bt toxin</b>             | .         | .          | 4          | 4          | 0         | .          | 4         | 4          | Uk                    | Uk                     | .                      |
|             | <b>Soil</b>                 | .         | .          | None       | Yes        | None      | .          | None      | None       | None                  | Uk                     | .                      |
| <b>2014</b> | <b>Crop</b>                 | Corn      | Corn       | Soy        | Corn       | Soy       | Corn       | Soy       | Soy        | Soy                   | Soy                    | Corn                   |
|             | <b>Bt toxin</b>             | 4         | 0          | .          | 4          | .         | 2          | .         | .          | .                     | .                      | Uk                     |
|             | <b>Soil</b>                 | Yes       | None       | .          | Yes        | .         | None       | .         | .          | .                     | .                      | Uk                     |
| <b>2013</b> | <b>Crop</b>                 | Corn      | Soy        | Corn       | Corn       | Corn      | Corn       | Soy       | Soy        | Corn                  | Corn                   | Corn                   |
|             | <b>Bt toxin</b>             | 4         | .          | 4          | 4          | 2         | Uk         | .         | .          | Uk                    | Uk                     | Uk                     |
|             | <b>Soil</b>                 | Yes       | .          | None       | Yes        | Yes       | None       | .         | .          | Yes                   | Uk                     | Uk                     |
| <b>2012</b> | <b>Crop</b>                 | Soy       | Corn       | Soy        | Corn       | Corn      | Corn       | Corn      | Corn       | Corn                  | Corn                   | Corn                   |
|             | <b>Bt toxin</b>             | .         | 0          | .          | 4          | 1         | 0          | 4         | 4          | Uk                    | Uk                     | Uk                     |
|             | <b>Soil</b>                 | .         | None       | .          | Yes        | None      | None       | None      | None       | Yes                   | Uk                     | Uk                     |

<sup>1</sup>Fields with numbers only are focal fields, and fields with a number and a letter are surrounding fields associated with the focal field number (e.g., Field 1 is a focal field, and Fields 1a, 1b, 1c, and 1d are its associated surrounding fields).

<sup>2</sup>Corn = Corn; Soy = Soybean; Alfa = Alfalfa; Uk = Unknown.

<sup>3</sup>Key for Bt toxins: 0 = no Bt targeting rootworm present; 1 = Cry3Bb1; 2 = Cry34/35Ab1; 3 = mCry3A; 4 = Cry3Bb1+Cry34/35Ab1; 5 = mCry3A+Cry34/35Ab1; Uk = Unknown.

<sup>4</sup>Excluded from multiple regression analysis.

**Supplemental Table S3. (Continued)** Field cropping history for fields sampled in 2017.

| <b>Year</b> | <b>Field</b>    | <b>18c<sup>4</sup></b> | <b>19<sup>4</sup></b> | <b>19a<sup>4</sup></b> | <b>20</b> | <b>20a</b> | <b>20b</b> |
|-------------|-----------------|------------------------|-----------------------|------------------------|-----------|------------|------------|
| <b>2017</b> | <b>Crop</b>     | Corn                   | Corn                  | Corn                   | Corn      | Corn       | Corn       |
|             | <b>Bt toxin</b> | 0                      | 4                     | 0                      | 0         | 0          | 4          |
|             | <b>Soil</b>     | None                   | None                  | None                   | None      | None       | Yes        |
| <b>2016</b> | <b>Crop</b>     | Corn                   | Corn                  | Soy                    | Soy       | Soy        | Corn       |
|             | <b>Bt toxin</b> | Uk                     | Uk                    | .                      | .         | .          | 4          |
|             | <b>Soil</b>     | Uk                     | None                  | .                      | .         | .          | None       |
| <b>2015</b> | <b>Crop</b>     | Soy                    | Soy                   | Corn                   | Corn      | Corn       | Corn       |
|             | <b>Bt toxin</b> | .                      | .                     | Uk                     | 4         | 4          | 4          |
|             | <b>Soil</b>     | .                      | .                     | None                   | None      | None       | None       |
| <b>2014</b> | <b>Crop</b>     | Corn                   | Corn                  | Soy                    | Corn      | Corn       | Corn       |
|             | <b>Bt toxin</b> | Uk                     | Uk                    | .                      | 4         | 4          | 4          |
|             | <b>Soil</b>     | Uk                     | None                  | .                      | None      | None       | None       |
| <b>2013</b> | <b>Crop</b>     | Corn                   | Corn                  | Corn                   | Soy       | Soy        | Corn       |
|             | <b>Bt toxin</b> | Uk                     | Uk                    | Uk                     | .         | .          | 1          |
|             | <b>Soil</b>     | Uk                     | None                  | None                   | .         | .          | None       |
| <b>2012</b> | <b>Crop</b>     | Corn                   | Corn                  | Soy                    | Corn      | Corn       | Corn       |
|             | <b>Bt toxin</b> | Uk                     | Uk                    | .                      | 1         | 1          | Uk         |
|             | <b>Soil</b>     | Uk                     | None                  | .                      | None      | None       | None       |

<sup>1</sup>Fields with numbers only are focal fields, and fields with a number and a letter are surrounding fields associated with the focal field number (e.g., Field 1 is a focal field, and Fields 1a, 1b, 1c, and 1d are its associated surrounding fields).

<sup>2</sup>Corn = Corn; Soy = Soybean; Alfa = Alfalfa; Uk = Unknown.

<sup>3</sup>Key for Bt toxins: 0 = no Bt targeting rootworm present; 1 = Cry3Bb1; 2 = Cry34/35Ab1; 3 = mCry3A; 4 = Cry3Bb1+Cry34/35Ab1; 5 = mCry3A+Cry34/35Ab1; Uk = Unknown.

<sup>4</sup>Excluded from multiple regression analysis.

**Supplemental Table S4.** Correlation matrix of potential variables for multiple regression analysis.

| Variable | 1     | 2     | 3     | 4     | 5           | 6     | 7     | 8           | 9     | 10    | 11    | 12    | 13   | 14 |
|----------|-------|-------|-------|-------|-------------|-------|-------|-------------|-------|-------|-------|-------|------|----|
| 1        | 1     | -     | -     | -     | -           | -     | -     | -           | -     | -     | -     | -     | -    | -  |
| 2        | -0.22 | 1     | -     | -     | -           | -     | -     | -           | -     | -     | -     | -     | -    | -  |
| 3        | -0.12 | -0.09 | 1     | -     | -           | -     | -     | -           | -     | -     | -     | -     | -    | -  |
| 4        | -0.65 | -0.48 | -0.26 | 1     | -           | -     | -     | -           | -     | -     | -     | -     | -    | -  |
| 5        | 0.05  | -0.06 | 0.02  | -0.02 | 1           | -     | -     | -           | -     | -     | -     | -     | -    | -  |
| 6        | -0.29 | -0.07 | -0.10 | 0.34  | 0.26        | 1     | -     | -           | -     | -     | -     | -     | -    | -  |
| 7        | -0.33 | -0.04 | -0.16 | 0.38  | 0.30        | 0.75  | 1     | -           | -     | -     | -     | -     | -    | -  |
| 8        | 0.04  | -0.02 | 0.10  | -0.06 | <b>0.86</b> | 0.10  | 0.25  | 1           | -     | -     | -     | -     | -    | -  |
| 9        | 0.63  | -0.14 | -0.11 | -0.40 | -0.11       | -0.47 | -0.51 | -0.10       | 1     | -     | -     | -     | -    | -  |
| 10       | 0.13  | 0.64  | 0.02  | -0.50 | 0.28        | -0.07 | 0.08  | 0.32        | -0.13 | 1     | -     | -     | -    | -  |
| 11       | -0.16 | -0.09 | 0.47  | 0.05  | -0.06       | -0.05 | 0.11  | 0.02        | 0.08  | -0.08 | 1     | -     | -    | -  |
| 12       | -0.56 | -0.29 | -0.01 | 0.67  | -0.11       | 0.43  | 0.32  | -0.17       | -0.71 | -0.58 | -0.17 | 1     | -    | -  |
| 13       | -0.13 | 0.09  | 0.12  | 0.00  | <b>0.80</b> | 0.17  | 0.31  | <b>0.94</b> | -0.26 | 0.33  | 0.06  | -0.06 | 1    | -  |
| 14       | 0.42  | -0.10 | -0.05 | -0.24 | 0.37        | -0.19 | -0.06 | 0.38        | 0.41  | 0.00  | -0.08 | -0.32 | 0.03 | 1  |

<sup>a</sup> Variable numbers are:

- |                                             |                                                                            |
|---------------------------------------------|----------------------------------------------------------------------------|
| 1 Non -Bt corn (year of sampling)           | 8 Proportion of years soil insecticide was used in 6 years                 |
| 2 Cry3 corn (year of sampling)              | 9 Proportion of years non-Bt corn was grown in 6 years                     |
| 3 Cry34/35Ab1 corn (year of sampling)       | 10 Proportion of years Cry3 corn was grown in 6 years                      |
| 4 Pyramided corn (year of sampling)         | 11 Proportion of years Cry34/35Ab1 was grown in 6 years                    |
| 5 Soil insecticide use (year of sampling)   | 12 Proportion of years pyramided corn was grown in 6 years                 |
| 6 Years of continuous corn                  | 13 Proportion of years soil insecticide was used on Bt corn in 6 years     |
| 7 Proportion of years corn grown in 6 years | 14 Proportion of years soil insecticide was used on non-Bt corn in 6 years |

<sup>b</sup> Variables 5 and 13 were excluded from multiple regression analysis due to collinearity with other variable
